# Supplementary material for: ATR promotes mTORC1 activity via de novo cholesterol synthesis
Source: Springer Nature journal article supplement (doi:10.1038/s44319-025-00451-3), 2025-06-13
Supplement: MOESM1 [file 44319_2025_451_MOESM1_ESM.pdf]

# ATR promotes mTORC1 activity via de novo cholesterol synthesis

Naveen Tangudu, Alexandra Grumet, Richard Fang, Raquel Buj, Aidan Cole, Apoorva Uboveja, Amandine Amalric, Baixue Yang, Zhentai Huang, Cassandra Happe, Mai Sun, Stacy Gelhaus, Matthew MacDonald, Nadine Hempel, Nathaniel Snyder, Katarzyna Kedziora, Alexander Valvezan, and Katherine Aird

*Corresponding author(s): Katherine Aird (kaa140@pitt.edu) , Alexander Valvezan (valvezan@cabm.rutgers.edu)*

---

## Review Timeline:

|                     |             |
|---------------------|-------------|
| Submission Date:    | 5th Nov 24  |
| Editorial Decision: | 29th Nov 24 |
| Revision Received:  | 14th Mar 25 |
| Editorial Decision: | 26th Mar 25 |
| Revision Received:  | 1st Apr 25  |
| Accepted:           | 7th Apr 25  |

---

*Editor: Esther Schnapp*

## Transaction Report:

(Note: With the exception of the correction of typographical or spelling errors that could be a source of ambiguity, letters and reports are not edited. Depending on transfer agreements, referee reports obtained elsewhere may or may not be included in this compilation. Referee reports are anonymous unless the Referee chooses to sign their reports.)

Dear Dr. Aird,

Thank you for the transfer of your manuscript to EMBO reports. We have now received the enclosed comments from 2 referees and given that both are in fair agreement I am making a decision on your ms now in order to save time.

As you will see, the referees acknowledge that the findings are interesting. However, they also have several suggestions for how your study could be strengthened and we think that all suggestions are good. While may be not all suggestions will need to be addressed, we do think that some further insight/data on how ATR impacts on mTORC1 activation will be required for the publication of your study here. I am happy to discuss a revision plan with you, either by email if you send me a proposed revision plan, or also a video chat would be fine. As you prefer. Please let me know how you would like to proceed.

I would thus like to invite you to revise your manuscript with the understanding that the referee concerns must be fully addressed and their suggestions taken on board. Please address all referee concerns in a complete point-by-point response. Acceptance of the manuscript will depend on a positive outcome of a second round of review. It is EMBO reports policy to allow a single round of major revision only and acceptance or rejection of the manuscript will therefore depend on the completeness of your responses included in the next, final version of the manuscript.

We realize that it is difficult to revise to a specific deadline. In the interest of protecting the conceptual advance provided by the work, we recommend a revision within 3 months (1st Mar 2025). Please discuss the revision progress ahead of this time with the editor if you require more time to complete the revisions.

You can either publish the study as a short report or as a full article. For short reports, the revised manuscript should not exceed 27,000 characters (including spaces but excluding materials & methods and references) and 5 main plus 5 expanded view figures. The results and discussion sections must further be combined, which will help to shorten the manuscript text by eliminating some redundancy that is inevitable when discussing the same experiments twice. For a normal article there are no length limitations, but it should have more than 5 main figures and the results and discussion sections must be separate. In both cases, the entire materials and methods must be included in the main manuscript file.

**IMPORTANT NOTE:** we perform an initial quality control of all revised manuscripts before re-review. Your manuscript will FAIL this control and the handling will be DELAYED if the following APPLIES:

- 1) A data availability section providing access to data deposited in public databases is missing. If you have not deposited any data, please add a sentence to the data availability section that explains that.
- 2) Your manuscript contains statistics and error bars based on  $n=2$ . Please use scatter blots in these cases. No statistics should be calculated if  $n=2$ .

When submitting your revised manuscript, please carefully review the instructions that follow below. Failure to include requested items will delay the evaluation of your revision.

1) a .docx formatted version of the manuscript text (including legends for main figures, EV figures and tables). Please make sure that the changes are highlighted to be clearly visible.

2) individual production quality figure files as .eps, .tif, .jpg (one file per figure). See [https://wol-prod-cdn.literatumonline.com/pb-assets/embo-site/EMBOPress\\_Figure\\_Guidelines\\_061115-1561436025777.pdf](https://wol-prod-cdn.literatumonline.com/pb-assets/embo-site/EMBOPress_Figure_Guidelines_061115-1561436025777.pdf) for more info on how to prepare your figures.

3) We replaced Supplementary Information with Expanded View (EV) Figures and Tables that are collapsible/expandable online. A maximum of 5 EV Figures can be typeset. EV Figures should be cited as 'Figure EV1, Figure EV2' etc... in the text and their respective legends should be included in the main text after the legends of regular figures.

- For the figures that you do NOT wish to display as Expanded View figures, they should be bundled together with their legends in a single PDF file called \*Appendix\*, which should start with a short Table of Content. Appendix figures should be referred to in the main text as: "Appendix Figure S1, Appendix Figure S2" etc. See detailed instructions regarding expanded view here:

- Additional Tables/Datasets should be labeled and referred to as Table EV1, Dataset EV1, etc. Legends have to be provided in a separate tab in case of .xls files. Alternatively, the legend can be supplied as a separate text file (README) and zipped together with the Table/Dataset file.

4) a .docx formatted letter INCLUDING the reviewers' reports and your detailed point-by-point responses to their comments. As part of the EMBO Press transparent editorial process, the point-by-point response is part of the Review Process File (RPF), which will be published alongside your paper.

5) a complete author checklist, which you can download from our author guidelines . Please insert information in the checklist that is also reflected in the manuscript. The completed author checklist will also be part of the RPF.

6) Please note that all corresponding authors are required to supply an ORCID ID for their name upon submission of a revised manuscript (). Please find instructions on how to link your ORCID ID to your account in our manuscript tracking system in our Author guidelines

7) Before submitting your revision, primary datasets produced in this study need to be deposited in an appropriate public database (see <https://www.embopress.org/page/journal/14693178/authorguide#datadeposition>). Please remember to provide a reviewer password if the datasets are not yet public. The accession numbers and database should be listed in a formal "Data Availability" section placed after Materials & Method (see also <https://www.embopress.org/page/journal/14693178/authorguide#datadeposition>). Please note that the Data Availability Section is restricted to new primary data that are part of this study. \* Note - All links should resolve to a page where the data can be accessed. \*  
If your study has not produced novel datasets, please mention this fact in the Data Availability Section.

8) At EMBO Press we ask authors to provide source data for the main manuscript figures. Our source data coordinator will contact you to discuss which figure panels we would need source data for and will also provide you with helpful tips on how to upload and organize the files.

9) Our journal also encourages inclusion of \*data citations in the reference list\* to directly cite datasets that were re-used and obtained from public databases. Data citations in the article text are distinct from normal bibliographical citations and should directly link to the database records from which the data can be accessed. In the main text, data citations are formatted as follows: "Data ref: Smith et al, 2001" or "Data ref: NCBI Sequence Read Archive PRJNA342805, 2017". In the Reference list, data citations must be labeled with "[DATASET]". A data reference must provide the database name, accession number/identifiers and a resolvable link to the landing page from which the data can be accessed at the end of the reference. Further instructions are available at <https://www.embopress.org/page/journal/14693178/authorguide#referencesformat>

10) Regarding data quantification (see Figure Legends:  
<https://www.embopress.org/page/journal/14693178/authorguide#figureformat>)

The following points must be specified in each figure legend:

- the name of the statistical test used to generate error bars and P values,
- the number (n) of independent experiments (please specify technical or biological replicates) underlying each data point,
- the nature of the bars and error bars (s.d., s.e.m.),
- If the data are obtained from n {less than or equal to} 2, use scatter blots showing the individual data points.

Discussion of statistical methodology can be reported in the materials and methods section, but figure legends should contain a basic description of n, P and the test applied.

- Please also include scale bars in all microscopy images.

11) The journal requires a statement specifying whether or not authors have competing interests (defined as all potential or actual interests that could be perceived to influence the presentation or interpretation of an article). In case of competing interests, this must be specified in your disclosure statement. Further information: <https://www.embopress.org/competing-interests>

12) All Materials and Methods need to be described in the main text using our 'Structured Methods' format, which is required for all research articles. According to this format, the Methods section includes a Reagents and Tools Table (listing key reagents, experimental models, software and relevant equipment and including their sources and relevant identifiers) followed by a Methods and Protocols section describing the methods using a step-by-step protocol format. The aim is to facilitate adoption of the methodologies across labs. More information on how to adhere to this format as well as a downloadable template (.docx) for the Reagents and Tools Table can be found in our author guidelines:  
<https://www.embopress.org/page/journal/14693178/authorguide#structuredmethods>.

An example of a Method paper with Structured Methods can be found here: <https://www.embopress.org/doi/full/10.1038/s44320-024-00037-6#sec-4>

We would also welcome the submission of cover suggestions, or motifs to be used by our Graphics Illustrator in designing a cover.

As part of the EMBO publication's Transparent Editorial Process, EMBO reports publishes online a Review Process File (RPF) to accompany accepted manuscripts. This File will be published in conjunction with your paper and will include the referee reports, your point-by-point response and all pertinent correspondence relating to the manuscript.

You are able to opt out of this by letting the editorial office know ([emboreports@embo.org](mailto:emboreports@embo.org)). If you do opt out, the Review Process File link will point to the following statement: "No Review Process File is available with this article, as the authors have chosen not to make the review process public in this case."

I look forward to seeing a revised form of your manuscript when it is ready.

Best regards,  
Esther

Esther Schnapp, PhD  
Senior Editor  
EMBO reports

Referee #1:

This study provides an intriguing look at how ATR regulates the mTORC1 pathway through cholesterol metabolism, bridging the DDR and cellular growth signaling. While the role of ATR in influencing mTORC1 under stress is known, this work highlights its significance in non-stressed conditions, particularly through cholesterol synthesis driven by LSS. The study reveals that ATR promotes mTORC1 activation independently of CHK1 and the TSC complex, with supplementation of cholesterol or lanosterol restoring mTORC1 activity after ATR inhibition. By facilitating mTOR localization to lysosomes, ATR underscores a novel metabolic mechanism with potential implications for cancer therapy and age-related processes like T-cell proliferation. The manuscript is well-written, and its conclusions are generally well-supported by the data. However, a few points warrant further attention:

The connection between ATR and LSS is compelling but lacks mechanistic detail. It would be valuable to investigate whether ATR directly modulates LSS, perhaps via phosphorylation or transcriptional regulation.

The study heavily focuses on p16-deficient cells. Extending experiments to other cell types, such as immune or epithelial cells, or models with different genetic backgrounds, could establish whether the impact of ATR on cholesterol metabolism and mTORC1 is a generalizable phenomenon.

Given the emerging role of ATR in the cytoplasm, it would be worthwhile to test whether it interacts directly with lysosomal proteins such as LAMP2 or NPC1, which could add depth to the proposed mechanism.

Since DDR and mTORC1 are closely linked, exploring whether DNA damage influences the effect of ATR on cholesterol synthesis could provide deeper insights into the bidirectional relationship between these pathways.

Referee #2:

Tangudu and colleagues present an exciting connection between ATR and mTORC1 signaling, revealing cholesterol metabolism as a key intermediary. Their findings demonstrate that ATR promotes de novo cholesterol synthesis and mTORC1 activation by upregulating lanosterol synthase (LSS), independently of CHK1 and the TSC complex. Remarkably, the inhibition of ATR reduced mTORC1 activity, a defect rescued by lanosterol or cholesterol supplementation, emphasizing cholesterol's role in mTOR lysosomal localization and activation.

This study offers an exciting insight into how ATR and mTORC1 signaling are linked via cholesterol metabolism.

1) One fundamental point would be to address the molecular mechanisms underlying the regulation of LSS by ATR. Does ATR act through established DNA damage response (DDR) effectors, such as transcription factors like E2F1, or does it engage previously unrecognized regulatory pathways? Additionally, while ATR's potential cytoplasmic activity is noted, the possibility that ATR directly phosphorylates LSS to influence its stability or enzymatic function remains unexplored. Experimental validation of these mechanisms would significantly enhance our understanding of how ATR integrates DDR signaling with metabolic regulation.

2) While this study highlights cholesterol's role in mTORC1 activation, its broader implications in tumorigenesis warrant further discussion. Cholesterol also supports membrane synthesis in proliferating cells and contributes to steroid biosynthesis, both of which are crucial in cancer progression. Expanding the discussion to encompass these roles would highlight the ATR-LSS axis's multifaceted contributions to cancer biology.

3) Given prior work showing LYCHOS as a cholesterol-sensing mediator for mTORC1, examining whether LYCHOS is involved downstream of ATR could clarify how cholesterol signals are transduced to mTORC1.

4) ATR inhibitors are under clinical development, yet this study suggests potential metabolic side effects related to mTORC1 signaling and cholesterol synthesis. Expanding on the implications for therapy design, including combinatorial strategies to mitigate side effects, would add translational value.

5) While ATR is highlighted, ATM inhibition also impacts mTORC1, albeit less strongly. A more detailed exploration of the differential and overlapping roles of ATR and ATM in cholesterol metabolism and mTORC1 regulation could provide a more comprehensive understanding of these pathways and their interplay.

We would like to express our sincere gratitude to the referees and the Editor for their constructive and thoughtful review of our review submitted to *EMBO Reports*. We are grateful for the acknowledgment from the Editor and all Reviewers regarding the significance and impact of our research, including “***the findings are interesting***” (Senior Editor); “***This study provides an intriguing look at how ATR regulates the mTORC1 pathway through cholesterol metabolism***” (Reviewer #1); “***This study offers an exciting insight into how ATR and mTORC1 signaling are linked via cholesterol metabolism***” (Reviewer #2). This positive evaluation validates the scientific merit of our work in investigating that ATR promotes mTORC1 activity via *de novo* cholesterol synthesis.

We truly appreciate the critical role and effort of this set of knowledgeable and helpful reviewers. Our commitment to addressing the Reviewers' comments is reflected in the comprehensive point-by-point response outlined below and a **significant amount of new data presented in the revised manuscript**. We believe that these revisions have resulted in a more compelling, robust, cohesive, and scientifically sound manuscript connecting ATR and mTORC1 signaling.

## **Reviewer #1**

**Comment 1:** The connection between ATR and LSS is compelling but lacks mechanistic detail. It would be valuable to investigate whether ATR directly modulates LSS, perhaps via phosphorylation or transcriptional regulation.

**Response:** We thank the reviewer for this thoughtful suggestion to deepen the mechanistic insights of our work. We have provided new experimental evidence that ATR directly modulates LSS through phosphorylation but not transcription, which we will detail below.

**Regulation of LSS by ATR-mediated phosphorylation:** LSS has 5 potential ATR phospho sites (S\*/T\*Q) (**Fig. S3F**). Unfortunately, there are no commercially available LSS phospho-specific antibodies. Therefore, to investigate whether ATR directly modulates LSS through phosphorylation, we immunoprecipitated LSS in p16 knockdown cells with or without ATR knockdown and assessed potential phosphorylation sites via immunoblotting using a Phospho-ATM/ATR Substrate antibody. We found that ATR knockdown reduces phosphorylation of LSS (**new Fig. 3H**). These data point to LSS as a direct ATR substrate, which has been noted in the revised text (**Page 9-10, Lines 212-214**). Further mechanistic studies to determine which residue(s) ATR phosphorylates and whether/how they affect LSS levels, activity, or localization will be interesting for future studies. We have discussed this in the revised text (**Page 13, 272-278**).

**Transcriptional Regulation by ATR:** To evaluate whether ATR directly modulates LSS through transcriptional regulation, we performed RNA-Seq on p16 knockdown cells with or without ATR knockdown. We observed a modest (<1.5 fold) increase in LSS expression upon knockdown of p16; however, ATR knockdown did not rescue this effect (**new Fig. S3E**). These data demonstrate that ATR does not transcriptionally regulate LSS.

**Comment 2:** The study heavily focuses on p16-deficient cells. Extending experiments to other cell types, such as immune or epithelial cells, or models with different genetic backgrounds, could establish whether the impact of ATR on cholesterol metabolism and mTORC1 is a generalizable phenomenon.

**Response:** We appreciate the reviewer's thoughtful suggestion. In addition to the p16-deficient melanoma cells, we also found that ATR regulates mTORC1 activation in HeLa cells (a human epithelial adenocarcinoma cell line), HEK293 cells (Human Embryonic Kidney cells, an epithelial cell line), and MEFs (Mouse Embryonic Fibroblasts) (**Fig. 1A-F, EV1, and EV2C**), suggesting that the mechanism of ATR mediating mTORC1 activity is a generalizable phenomenon. To better understand whether this is mediated via cholesterol in all cell lines, we inhibited ATR in these cell lines and supplemented them with cholesterol and assessed mTORC1 activation via S6K phosphorylation. Unexpectedly, we found that cholesterol rescues pS6K in both of our cancer cell models (**new Fig. 4A-B, 4E, 4G and Fig. EV4A-B**) while cholesterol did not rescue pS6K in normal cells (**new Fig. EV4C-D**). Together, these data have uncovered a surprising finding that ATR can regulate mTORC1 activity via cholesterol in cancer cells, whereas normal cells may have an alternative pathway. Although outside the scope of the current study, it is intriguing to speculate that this is due to lipid metabolic derangement or high basal replication stress of cancer cells. It is also possible that these cells take up less cholesterol. We have noted that this phenomenon seems to be generalizable to cancer but not normal cells (**Page 10, Lines 225-229**) and expanded on this interesting observation in the revised Discussion (**Page 13, Lines 282-286**).

**Comment 3:** Given the emerging role of ATR in the cytoplasm, it would be worthwhile to test whether it interacts directly with lysosomal proteins such as LAMP2 or NPC1, which could add depth to the proposed mechanism.

**Response:** We appreciate the reviewer for this intriguing comment regarding ATR in the cytoplasm. We found that ATR is upstream of LSS, which is not known to be at the lysosome. Interestingly, prior high throughput proteomics studies found LSS in or near the nucleus (MacDonald et al., 2024; Wang et al., 2017). Together, these data indicate it is likely that the ATR and LSS interaction does not occur at the lysosome. Moreover, we agree with the reviewer that further assessment of ATR and LSS localization would provide valuable information regarding the mechanism and may also point to why this mechanism is cancer cell specific. We did find that LSS is phosphorylated by ATR (**new Fig. 3H**; an experiment in response to Comment #1), and future studies will be aimed at probing whether this occurs in the nucleus. We have expanded on this idea in the revised Discussion (**Page 13, Lines 272-276**).

**Comment 4:** Since DDR and mTORC1 are closely linked, exploring whether DNA damage influences the effect of ATR on cholesterol synthesis could provide deeper insights into the bidirectional relationship between these pathways.

**Response:** We thank the reviewer for this suggestion. To explore whether DNA damage influences the effect of ATR on cholesterol synthesis, we induced replication stress in cancer cells by treating with hydroxyurea to activate ATR and quantified cholesterol using filipin staining. Indeed, inducing replication stress in cancer cells increased cholesterol levels, which was abrogated by ATR inhibition (**new Fig. EV3D-E**). These data provide important insights into the bidirectional relationship between the DNA damage and mTORC1 pathways. We also believe these data may provide additional evidence to explain why cancer cells, which have high basal levels of replication stress, have a more active ATR-cholesterol-mTORC1 signaling pathway than normal cells. This point has been added to the revised text (**Page 13, Lines 282-286**).

## **Reviewer #2**

**Comment 1:** One fundamental point would be to address the molecular mechanisms underlying the regulation of LSS by ATR. **A)** Does ATR act through established DNA damage response (DDR) effectors, such as transcription factors like E2F1, or does it engage previously unrecognized regulatory pathways? **B)** Additionally, while ATR's potential cytoplasmic activity is noted, the possibility that ATR directly phosphorylates LSS to influence its stability or enzymatic function remains unexplored. Experimental validation of these mechanisms would significantly enhance our understanding of how ATR integrates DDR signaling with metabolic regulation.

**Response:** We thank the reviewer for this insightful suggestion. **Reviewer #1** had a similar question regarding the transcriptional regulation of *LSS* by ATR (Comment #1 above). Using RNA-Seq, we found that ATR does not affect *LSS* mRNA expression (**new Fig. EV4F**), demonstrating that ATR does not upregulate *LSS* through a transcriptional factor like E2F1.

The second question regarding whether ATR directly phosphorylates *LSS* is an intriguing one. *LSS* has 5 potential ATR phospho sites (S\*/T\*Q) (**Fig. EV4G**). Unfortunately, there are no commercially available *LSS* phospho-specific antibodies. Therefore, to investigate whether ATR directly modulates *LSS* through phosphorylation, we immunoprecipitated *LSS* in p16 knockdown cells with or without ATR knockdown and assessed potential phosphorylation sites via immunoblotting using a Phospho-ATM/ATR Substrate antibody. We found that ATR knockdown reduces phosphorylation of *LSS* (**new Fig. 3H**). These data point to *LSS* as a direct ATR substrate, which has been noted in the revised text (**Pages 9-10, Lines 212-215**). How this phosphorylation affects *LSS* remains to be explored. Further mechanistic studies to determine the residue(s) ATR phosphorylates and how that event directly affects *LSS* stability, activity, or localization will be interesting for future studies. We have discussed this in the revised text (**Page 13, Lines 272-276**).

**Comment 2:** While this study highlights cholesterol's role in mTORC1 activation, its broader implications in tumorigenesis warrant further discussion. Cholesterol also supports membrane synthesis in proliferating cells and contributes to steroid biosynthesis, both of which are crucial in cancer progression. Expanding the discussion to encompass these roles would highlight the ATR-LSS axis's multifaceted contributions to cancer biology.

**Response:** We thank reviewer for this comment. We have discussed these points in the manuscript and expanded the revised text by adding more discussion points to emphasize the ATR-LSS axis's multifaceted contributions to cancer biology, including tumor progression, tumor microenvironment reprogramming, and metastasis (**Page 14, Lines 296-306**).

**Comment 3:** Given prior work showing LYCHOS as a cholesterol-sensing mediator for mTORC1, examining whether LYCHOS is involved downstream of ATR could clarify how cholesterol signals are transduced to mTORC1.

**Response:** We thank reviewer for this suggestion. Unfortunately, due to unanticipated technical challenges, we have been unable to knockdown LYCHOS in our cell lines. In fact, we attempted this knock down experiment four independent times with 5 independent shRNAs. To our knowledge, LYCHOS is the only cholesterol sensor at the lysosome (Shin et al., 2022). Therefore, given that we observed increased mTOR at the lysosome in the context of high cholesterol (**Fig. 5**), it is probable that the cholesterol generated downstream of ATR is sensed by LYCHOS to activate mTORC1. We have clarified this point in the revised text (**Page 13-14, Lines 291-296**).

**Comment 4:** ATR inhibitors are under clinical development, yet this study suggests potential metabolic side effects related to mTORC1 signaling and cholesterol synthesis. Expanding on the implications for therapy design, including combinatorial strategies to mitigate side effects, would add translational value.

**Response:** We thank reviewer for this helpful suggestion. We expanded our discussion to address this thoughtful comment from the reviewer on implications of reduced mTORC1 activity downstream of ATR inhibitors, effects of cholesterol reduction on tumor growth and the tumor microenvironment, effects on the immune system and response to immunotherapies, and implications for treatment regimens and mitigating potential toxicities. We further discussed these points in the revised discussion section (**Pages 14-15, Lines 308-323**).

**Comment 5:** While ATR is highlighted, ATM inhibition also impacts mTORC1, albeit less strongly. A more detailed exploration of the differential and overlapping roles of ATR and ATM in cholesterol metabolism and mTORC1 regulation could provide a more comprehensive understanding of these pathways and their interplay.

**Response:** We thank reviewer for this intriguing comment. As the reviewer pointed out, in **Fig. 1 and 2D** we have shown that ATM knockdown and inhibition impacts mTORC1, albeit less strongly. To explore the role of ATM in cholesterol metabolism and mTORC1 regulation, we inhibited ATM in both control and TSC2 deficient cells and supplemented with cholesterol to assess mTORC1 activation via pS6K expression. We found that unlike ATR, which mediates mTORC1 via cholesterol in cancer cell lines, and independent of the TSC complex (**Fig. 1E, 3-4 and EV4A-B**), ATM mediates mTORC1 via the TSC complex (**Fig. 1G**), and ATM inhibition is not rescued by cholesterol even in cancer cells (**Fig. EV4B**). Together, our data demonstrate that ATR and ATMs have differential roles in cholesterol metabolism and mTORC1 regulation.

## References

MacDonald, K.M., Khan, S., Lin, B., Hurren, R., Schimmer, A.D., Kislinger, T., and Harding, S.M. (2024). The proteomic landscape of genotoxic stress-induced micronuclei. *Molecular cell* 84, 1377-1391.e1376.

Shin, H.R., Citron, Y.R., Wang, L., Tribouillard, L., Goul, C.S., Stipp, R., Sugasawa, Y., Jain, A., Samson, N., Lim, C.Y., *et al.* (2022). Lysosomal GPCR-like protein LYCHOS signals cholesterol sufficiency to mTORC1. *Science (New York, NY)* 377, 1290-1298.

Wang, J., Mauvoisin, D., Martin, E., Atger, F., Galindo, A.N., Dayon, L., Sizzano, F., Palini, A., Kussmann, M., Waridel, P., *et al.* (2017). Nuclear Proteomics Uncovers Diurnal Regulatory Landscapes in Mouse Liver. *Cell metabolism* 25, 102-117.

Dear Dr. Aird,

Thank you for the submission of your revised manuscript. We have now received the enclosed reports from the referees and I am happy to say that both support its publication now. Only a few editorial requests will need to be addressed before we can proceed with the official acceptance of your manuscript:

- Please reduce the number of keywords to 5.
- Please correct the conflict of interest subheading to "Disclosure and Competing Interests Statement"
- There are 2 author name discrepancies: Naveen Kumar Tangudu in the ms vs. Naveen Tangudu in our online system; Katarzyna M. Kedziora in the ms vs. Kasia Kedziora in the online system. Please correct.
- Please remove the author credits from the ms file. All credits need to be entered during online ms submission.
- Some FUNDING INFO is missing in our online system: the Ludwig Institute for Cancer Research - Princeton Branch, please add when you submit the final ms.
- It is unclear what the file is that is uploaded as "Expanded View". Is this a Dataset? Please label correctly and add a title or legend. If it is a Dataset it needs to be called Dataset EV1.
- The Source Data (SD) needs to be uploaded as one SD file per main figure. SD for Fig 3C seems to be missing, or is this deposited to PRIDE PXD061265?
- The Data Availability Section (DAS), the Acknowledgments and the Disclosure Statement (in that order) need to be provided after the Methods and before the References. The DAS needs to provide a website link to your deposited data.
- Materials and Methods should be just Methods.
- Please provide the exact p values (as reasonable) in the legends of figures 3C, E, G; 5A, B; EV3 A, C, E, F; EV5 A, B.

I would like to suggest some minor changes to the abstract that needs to be written in present tense:

DNA damage and cellular metabolism exhibit a complex interplay characterized by bidirectional feedback. Key mediators of these pathways include Ataxia Telangiectasia and Rad3-related protein (ATR) and the mechanistic Target of Rapamycin Complex 1 (mTORC1), respectively. Previous studies established ATR as a regulatory upstream factor of mTORC1 during replication stress; however, the precise mechanisms remain poorly defined. Additionally, the activity of this signaling axis in unperturbed cells has not been extensively investigated. We demonstrate that ATR promotes mTORC1 activity across various cellular models under basal conditions. This effect is enhanced in cells following the loss of p16. Mechanistically, ATR promotes de novo cholesterol synthesis and mTORC1 activation through the phosphorylation and upregulation of lanosterol synthase (LSS), independently of both CHK1 and the TSC complex. Interestingly, this pathway is distinct from the regulation of mTORC1 by ATM and may be specific to cancer cells. Finally, ATR-mediated cholesterol increase correlates with enhanced localization of mTOR to lysosomes. Collectively, our findings demonstrate a novel connection linking ATR and mTORC1 signaling through the modulation of cholesterol metabolism.

I think it would be good to specify the cells used in your study a little more in the abstract. And to specify what p16 is.

EMBO press papers are accompanied online by A) a short (1-2 sentences) summary of the findings and their significance, B) 2-3 bullet points highlighting key results and C) a synopsis image that is exactly 550 pixels wide and 200-600 pixels high (the height is variable). The synopsis image should provide a sketch of the major findings, like a graphical abstract. Please note that text needs to be readable at the final size. Please send us this information along with the final manuscript.

I look forward to seeing a final version of your manuscript as soon as possible.

Best regards,  
Esther

Esther Schnapp, PhD  
Senior Editor

EMBO reports

Referee #1:

The authors have adequately addressed the Reviewers' concerns/remarks.

Referee #2:

The authors have addressed my comments. I congratulate the authors on this excellent research article!

All editorial and formatting issues were resolved by the authors.

Katherine Aird  
University of Pittsburgh School of Medicine  
United States

Dear Dr. Aird,

I am very pleased to accept your manuscript for publication in the next available issue of EMBO reports. Thank you for your contribution to our journal.

Your manuscript will be processed for publication by EMBO Press. It will be copy edited and you will receive page proofs prior to publication. Please note that you will be contacted by Springer Nature Author Services to complete licensing and payment information.

You may qualify for financial assistance for your publication charges - either via a Springer Nature fully open access agreement or an EMBO initiative. Check your eligibility: <https://www.embopress.org/page/journal/14693178/authorguide#chargesguide>

Should you be planning a Press Release on your article, please get in contact with [embo\\_production@springernature.com](mailto:embo_production@springernature.com) as early as possible in order to coordinate publication and release dates.

If you have any questions, please do not hesitate to contact the Editorial Office. Thank you for your contribution to EMBO Reports.

Best,  
Esther

Esther Schnapp, PhD  
Senior Editor  
EMBO reports

-----  
  
>>> Please note that it is EMBO Reports policy for the transcript of the editorial process (containing referee reports and your response letter) to be published as an online supplement to each paper. If you do NOT want this, you will need to inform the Editorial Office via email immediately. More information is available here: [https://www.embopress.org/transparent-process#Review\\_Process](https://www.embopress.org/transparent-process#Review_Process)

## EMBO Press Author Checklist

|                                              |
|----------------------------------------------|
| Corresponding Author Name: Katherine M. Aird |
| Journal Submitted to: EMBO Reports           |
| Manuscript Number: EMBOR-2024-60717-T        |

### USEFUL LINKS FOR COMPLETING THIS FORM

- [The EMBO Journal - Author Guidelines](#)
- [EMBO Reports - Author Guidelines](#)
- [Molecular Systems Biology - Author Guidelines](#)
- [EMBO Molecular Medicine - Author Guidelines](#)

### Reporting Checklist for Life Science Articles (updated January)

This checklist is adapted from Materials Design Analysis Reporting (MDAR) Checklist for Authors. MDAR establishes a minimum set of requirements in transparent reporting in the life sciences (see Statement of Task: [10.31222/osf.io/9sm4x](https://doi.org/10.31222/osf.io/9sm4x)). Please follow the journal's guidelines in preparing your article. **Please note that a copy of this checklist will be published alongside your article.**

#### Abridged guidelines for figures

##### 1. Data

The data shown in figures should satisfy the following conditions:

- the data were obtained and processed according to the field's best practice and are presented to reflect the results of the experiments in an accurate and unbiased manner.
- ideally, figure panels should include only measurements that are directly comparable to each other and obtained with the same assay.
- plots include clearly labeled error bars for independent experiments and sample sizes. Unless justified, error bars should not be shown for technical replicates.
- if  $n < 5$ , the individual data points from each experiment should be plotted. Any statistical test employed should be justified.
- Source Data should be included to report the data underlying figures according to the guidelines set out in the authorship guidelines on Data

##### 2. Captions

Each figure caption should contain the following information, for each panel where they are relevant:

- a specification of the experimental system investigated (eg cell line, species name).
- the assay(s) and method(s) used to carry out the reported observations and measurements.
- an explicit mention of the biological and chemical entity(ies) that are being measured.
- an explicit mention of the biological and chemical entity(ies) that are altered/varied/perturbed in a controlled manner.
- the exact sample size (n) for each experimental group/condition, given as a number, not a range;
- a description of the sample collection allowing the reader to understand whether the samples represent technical or biological replicates (including how many animals, litters, cultures, etc.).
- a statement of how many times the experiment shown was independently replicated in the laboratory.
- definitions of statistical methods and measures:
  - common tests, such as t-test (please specify whether paired vs. unpaired), simple  $\chi^2$  tests, Wilcoxon and Mann-Whitney tests, can be unambiguously identified by name only, but more complex techniques should be described in the methods section;
  - are tests one-sided or two-sided?
  - are there adjustments for multiple comparisons?
  - exact statistical test results, e.g., P values = x but not P values < x;
  - definition of 'center values' as median or average;
  - definition of error bars as s.d. or s.e.m.

**Please complete ALL of the questions below.  
Select "Not Applicable" only when the requested information is not relevant for your study.**

#### Materials

| <b>Newly Created Materials</b>                                                                                                                                                                                              | <b>Information included in the manuscript?</b> | <b>In which section is the information available?</b><br>(Reagents and Tools Table, Materials and Methods, Figures, Data Availability Section) |
|-----------------------------------------------------------------------------------------------------------------------------------------------------------------------------------------------------------------------------|------------------------------------------------|------------------------------------------------------------------------------------------------------------------------------------------------|
| New materials and reagents need to be available; do any restrictions apply?                                                                                                                                                 | Not Applicable                                 |                                                                                                                                                |
| <b>Antibodies</b>                                                                                                                                                                                                           | <b>Information included in the manuscript?</b> | <b>In which section is the information available?</b><br>(Reagents and Tools Table, Materials and Methods, Figures, Data Availability Section) |
| For <b>antibodies</b> provide the following information:<br>- Commercial antibodies: RRID (if possible) or supplier name, catalogue number and or/clone number<br>- Non-commercial: RRID or citation                        | Yes                                            | Reagents and tools table; Materials and Methods section                                                                                        |
| <b>DNA and RNA sequences</b>                                                                                                                                                                                                | <b>Information included in the manuscript?</b> | <b>In which section is the information available?</b><br>(Reagents and Tools Table, Materials and Methods, Figures, Data Availability Section) |
| <b>Short novel DNA or RNA including primers, probes:</b> provide the sequences.                                                                                                                                             | Yes                                            | Reagents and tools table; Materials and Methods section                                                                                        |
| <b>Cell materials</b>                                                                                                                                                                                                       | <b>Information included in the manuscript?</b> | <b>In which section is the information available?</b><br>(Reagents and Tools Table, Materials and Methods, Figures, Data Availability Section) |
| <b>Cell lines:</b> Provide species information, strain. Provide accession number in repository <b>OR</b> supplier name, catalog number, clone number, and <b>OR</b> RRID.                                                   | Yes                                            | Reagents and tools table; Materials and Methods section                                                                                        |
| <b>Primary cultures:</b> Provide species, strain, sex of origin, genetic modification status.                                                                                                                               | Not Applicable                                 |                                                                                                                                                |
| Report if the cell lines were recently <b>authenticated</b> (e.g., by STR profiling) and tested for mycoplasma contamination.                                                                                               | Yes                                            | Materials and Methods section                                                                                                                  |
| <b>Experimental animals</b>                                                                                                                                                                                                 | <b>Information included in the manuscript?</b> | <b>In which section is the information available?</b><br>(Reagents and Tools Table, Materials and Methods, Figures, Data Availability Section) |
| <b>Laboratory animals or Model organisms:</b> Provide species, strain, sex, age, genetic modification status. Provide accession number in repository <b>OR</b> supplier name, catalog number, clone number, <b>OR</b> RRID. | Not Applicable                                 |                                                                                                                                                |
| <b>Animal observed in or captured from the field:</b> Provide species, sex, and age where possible.                                                                                                                         | Not Applicable                                 |                                                                                                                                                |
| Please detail <b>housing and husbandry conditions</b> .                                                                                                                                                                     | Not Applicable                                 |                                                                                                                                                |
| <b>Plants and microbes</b>                                                                                                                                                                                                  | <b>Information included in the manuscript?</b> | <b>In which section is the information available?</b><br>(Reagents and Tools Table, Materials and Methods, Figures, Data Availability Section) |
| <b>Plants:</b> provide species and strain, ecotype and cultivar where relevant, unique accession number if available, and source (including location for collected wild specimens).                                         | Not Applicable                                 |                                                                                                                                                |
| <b>Microbes:</b> provide species and strain, unique accession number if available, and source.                                                                                                                              | Not Applicable                                 |                                                                                                                                                |
| <b>Human research participants</b>                                                                                                                                                                                          | <b>Information included in the manuscript?</b> | <b>In which section is the information available?</b><br>(Reagents and Tools Table, Materials and Methods, Figures, Data Availability Section) |
| If collected and within the bounds of privacy constraints report on age, sex and gender or ethnicity for all study participants.                                                                                            | Not Applicable                                 |                                                                                                                                                |
| <b>Core facilities</b>                                                                                                                                                                                                      | <b>Information included in the manuscript?</b> | <b>In which section is the information available?</b><br>(Reagents and Tools Table, Materials and Methods, Figures, Data Availability Section) |
| If your work benefited from core facilities, was their service mentioned in the acknowledgments section?                                                                                                                    | Yes                                            | Materials and Methods section                                                                                                                  |

#### Design

| <b>Study protocol</b>                                                                                                                                                    | <b>Information included in the manuscript?</b> | <b>In which section is the information available?</b><br>(Reagents and Tools Table, Materials and Methods, Figures, Data Availability Section) |
|--------------------------------------------------------------------------------------------------------------------------------------------------------------------------|------------------------------------------------|------------------------------------------------------------------------------------------------------------------------------------------------|
| If study protocol has been <b>pre-registered</b> , provide DOI in the <b>manuscript</b> . For clinical trials, provide the trial registration number <b>OR</b> cite DOI. | Not Applicable                                 |                                                                                                                                                |
| Report the <b>clinical trial registration number</b> (at ClinicalTrials.gov or equivalent), where applicable.                                                            | Not Applicable                                 |                                                                                                                                                |

| <b>Laboratory protocol</b>                                                                              | <b>Information included in the manuscript?</b> | <b>In which section is the information available?</b><br>(Reagents and Tools Table, Materials and Methods, Figures, Data Availability Section) |
|---------------------------------------------------------------------------------------------------------|------------------------------------------------|------------------------------------------------------------------------------------------------------------------------------------------------|
| Provide DOI OR other citation details if <b>external detailed step-by-step protocols</b> are available. | Not Applicable                                 |                                                                                                                                                |

| <b>Experimental study design and statistics</b>                                                                                                                                                                                                                                                                                            | <b>Information included in the manuscript?</b> | <b>In which section is the information available?</b><br>(Reagents and Tools Table, Materials and Methods, Figures, Data Availability Section) |
|--------------------------------------------------------------------------------------------------------------------------------------------------------------------------------------------------------------------------------------------------------------------------------------------------------------------------------------------|------------------------------------------------|------------------------------------------------------------------------------------------------------------------------------------------------|
| Include a statement about <b>sample size</b> estimate even if no statistical methods were used.                                                                                                                                                                                                                                            | Not Applicable                                 |                                                                                                                                                |
| Were any steps taken to minimize the effects of subjective bias when allocating animals/samples to treatment (e.g. <b>randomization procedure</b> )? If yes, have they been described?                                                                                                                                                     | Not Applicable                                 |                                                                                                                                                |
| Include a statement about <b>blinding</b> even if no blinding was done.                                                                                                                                                                                                                                                                    | Yes                                            | Materials and Methods section                                                                                                                  |
| Describe <b>inclusion/exclusion criteria</b> if samples or animals were excluded from the analysis. Were the criteria pre-established?                                                                                                                                                                                                     | Not Applicable                                 |                                                                                                                                                |
| If sample or data points were omitted from analysis, report if this was due to <b>attrition or intentional exclusion</b> and provide justification.                                                                                                                                                                                        |                                                |                                                                                                                                                |
| For every figure, are <b>statistical tests</b> justified as appropriate? Do the data meet the assumptions of the tests (e.g., normal distribution)? Describe any methods used to assess it. Is there an estimate of variation within each group of data? Is the variance similar between the groups that are being statistically compared? | Yes                                            | Figure and Materials and Methods section                                                                                                       |

| <b>Sample definition and in-laboratory replication</b>                                           | <b>Information included in the manuscript?</b> | <b>In which section is the information available?</b><br>(Reagents and Tools Table, Materials and Methods, Figures, Data Availability Section) |
|--------------------------------------------------------------------------------------------------|------------------------------------------------|------------------------------------------------------------------------------------------------------------------------------------------------|
| In the figure legends: state number of times the experiment was <b>replicated</b> in laboratory. | Yes                                            | Figures                                                                                                                                        |
| In the figure legends: define whether data describe <b>technical or biological replicates</b> .  | Yes                                            | Figures                                                                                                                                        |

## Ethics

| <b>Ethics</b>                                                                                                                                                                                                                                                                                            | <b>Information included in the manuscript?</b> | <b>In which section is the information available?</b><br>(Reagents and Tools Table, Materials and Methods, Figures, Data Availability Section) |
|----------------------------------------------------------------------------------------------------------------------------------------------------------------------------------------------------------------------------------------------------------------------------------------------------------|------------------------------------------------|------------------------------------------------------------------------------------------------------------------------------------------------|
| Studies involving <b>human participants</b> : State details of <b>authority granting ethics approval</b> (IRB or equivalent committee(s), provide reference number for approval).                                                                                                                        | Not Applicable                                 |                                                                                                                                                |
| Studies involving <b>human participants</b> : Include a statement confirming that <b>informed consent</b> was obtained from all subjects and that the experiments conformed to the principles set out in the WMA Declaration of Helsinki and the Department of Health and Human Services Belmont Report. | Not Applicable                                 |                                                                                                                                                |
| Studies involving <b>human participants</b> : For publication of <b>patient photos</b> , include a statement confirming that consent to publish was obtained.                                                                                                                                            | Not Applicable                                 |                                                                                                                                                |
| Studies involving experimental <b>animals</b> : State details of <b>authority granting ethics approval</b> (IRB or equivalent committee(s), provide reference number for approval. Include a statement of compliance with ethical regulations.                                                           | Not Applicable                                 |                                                                                                                                                |
| Studies involving <b>specimen and field samples</b> : State if relevant <b>permits</b> obtained, provide details of authority approving study; if none were required, explain why.                                                                                                                       | Not Applicable                                 |                                                                                                                                                |

| <b>Dual Use Research of Concern (DURC)</b>                                                                                                                                                                                                            | <b>Information included in the manuscript?</b> | <b>In which section is the information available?</b><br>(Reagents and Tools Table, Materials and Methods, Figures, Data Availability Section) |
|-------------------------------------------------------------------------------------------------------------------------------------------------------------------------------------------------------------------------------------------------------|------------------------------------------------|------------------------------------------------------------------------------------------------------------------------------------------------|
| Could your study fall under dual use research restrictions? Please check biosecurity documents and list of <b>select agents and toxins</b> (CDC): <a href="https://www.selectagents.gov/sat/list.htm">https://www.selectagents.gov/sat/list.htm</a> . | Not Applicable                                 |                                                                                                                                                |
| If you used a select agent, is the security level of the lab appropriate and reported in the manuscript?                                                                                                                                              | Not Applicable                                 |                                                                                                                                                |
| If a study is subject to dual use research of concern regulations, is the name of the <b>authority granting approval and reference number</b> for the regulatory approval provided in the manuscript?                                                 | Not Applicable                                 |                                                                                                                                                |

## Reporting

The MDAR framework recommends adoption of discipline-specific guidelines, established and endorsed through community initiatives. Journals have their own policy about requiring specific guidelines and recommendations to complement MDAR.

| <b>Adherence to community standards</b>                                                                                                                                                                                                                                                                                              | <b>Information included in the manuscript?</b> | <b>In which section is the information available?</b><br>(Reagents and Tools Table, Materials and Methods, Figures, Data Availability Section) |
|--------------------------------------------------------------------------------------------------------------------------------------------------------------------------------------------------------------------------------------------------------------------------------------------------------------------------------------|------------------------------------------------|------------------------------------------------------------------------------------------------------------------------------------------------|
| State if relevant guidelines or checklists (e.g., <b>ICMJE, MIBBI, ARRIVE, PRISMA</b> ) have been followed or provided.                                                                                                                                                                                                              | Not Applicable                                 |                                                                                                                                                |
| For <b>tumor marker prognostic studies</b> , we recommend that you follow the <b>REMARK</b> reporting guidelines (see link list at top right). See author guidelines, under 'Reporting Guidelines'. Please confirm you have followed these guidelines.                                                                               | Not Applicable                                 |                                                                                                                                                |
| For <b>phase II and III randomized controlled trials</b> , please refer to the <b>CONSORT</b> flow diagram (see link list at top right) and submit the <b>CONSORT</b> checklist (see link list at top right) with your submission. See author guidelines, under 'Reporting Guidelines'. Please confirm you have submitted this list. | Not Applicable                                 |                                                                                                                                                |

## Data Availability

| <b>Data availability</b>                                                                                                                                                                          | <b>Information included in the manuscript?</b> | <b>In which section is the information available?</b><br>(Reagents and Tools Table, Materials and Methods, Figures, Data Availability Section) |
|---------------------------------------------------------------------------------------------------------------------------------------------------------------------------------------------------|------------------------------------------------|------------------------------------------------------------------------------------------------------------------------------------------------|
| Have <b>primary datasets</b> been deposited according to the journal's guidelines (see 'Data Deposition' section) and the respective accession numbers provided in the Data Availability Section? | Yes                                            | Reagents and tools table; Materials and Methods section                                                                                        |
| Were <b>human clinical and genomic datasets</b> deposited in a public access-controlled repository in accordance to ethical obligations to the patients and to the applicable consent agreement?  | Not Applicable                                 |                                                                                                                                                |
| Are <b>computational models</b> that are central and integral to a study available without restrictions in a machine-readable form? Were the relevant accession numbers or links provided?        | Not Applicable                                 |                                                                                                                                                |
| If publicly available data were reused, provide the respective <b>data citations in the reference list</b> .                                                                                      | Yes                                            | References                                                                                                                                     |
